# Supplementary material
Source: publisher site journal article supplement (https://www.dovepress.com/article/493577)
Supplement: Supplementary file 1 [file get_supplementary_file.php]

**Supplementary table 1. Details of the treatment cycles, drug dose, and combined systemic therapy.**

| **No.** | **Gender** | **Age** | **Cycles of HAIC** | **Infusion time of 5-FU (h)** | **Dose of oxaliplatin (mg/m2)** | **Dose of 5-FU (mg/m2)** | **Times of DEB-TACE** | **Target Therapy** | **Immunotherapy** |
| --- | --- | --- | --- | --- | --- | --- | --- | --- | --- |
| 1 | Male | 25 | 7 | 23 | 85 | 2400 | 1 | Lenvatinib | Sintilimab |
| 2 | Male | 41 | 6 | 46 | 135 | 2400 | 1 | - | Toripalimab |
| 3 | Male | 54 | 5 | 23 | 85 | 2400 | 2 | Lenvatinib | Sintilimab |
| 4 | Male | 68 | 4 | 46 | 85 | 2400 | 1 | - | Nivolumab |
| 5 | Male | 69 | 6 | 46 | 135 | 2400 | 1 | Lenvatinib | Tislelizumab |
| 6 | Male | 47 | 6 | 23 | 85 | 2400 | 1 | Lenvatinib | Sintilimab |
| 7 | Male | 56 | 2 | 23 | 85 | 2400 | 2 | Lenvatinib | Sintilimab |
| 8 | Male | 49 | 4 | 23 | 85 | 2400 | 1 | Lenvatinib | Sintilimab |
| 9 | Male | 56 | 5 | 23 | 135 | 2400 | 1 | Lenvatinib | Sintilimab |
| 10 | Male | 40 | 4 | 23 | 85 | 2400 | 1 | Lenvatinib | Sintilimab |
| 11 | Male | 41 | 3 | 23 | 135 | 2400 | 1 | Lenvatinib | Sintilimab |
| 12 | Male | 58 | 4 | 23 | 85 | 2400 | 1 | Lenvatinib | Sintilimab |
| 13 | Male | 44 | 6 | 23 | 85 | 2400 | 3 | Lenvatinib | - |
| 14 | Male | 31 | 6 | 23 | 135 | 2400 | 1 | Lenvatinib | Sintilimab |
| 15 | Male | 51 | 4 | 23 | 135 | 2400 | 1 | - | Sintilimab |
| 16 | Male | 39 | 2 | 23 | 160 | 3000 | 1 | Bevacizumab | Sintilimab |
| 17 | Male | 57 | 6 | 23 | 85 | 2400 | 2 | Lenvatinib | Sintilimab |
| 18 | Male | 60 | 4 | 46 | 135 | 2400 | 1 | Lenvatinib | Tislelizumab |
| 19 | Male | 49 | 4 | 46 | 135 | 2400 | 2 | Lenvatinib | Tislelizumab |
| 20 | Male | 57 | 4 | 46 | 135 | 2400 | 1 | Lenvatinib | Tislelizumab |
| 21 | Male | 71 | 4 | 23 | 85 | 2400 | 3 | Lenvatinib | Tislelizumab |
| 22 | Male | 45 | 4 | 23 | 85 | 2400 | 1 | - | - |
| 23 | Male | 47 | 4 | 23 | 85 | 2400 | 1 | Lenvatinib | - |
| 24 | Male | 48 | 4 | 23 | 85 | 1200 | 2 | Lenvatinib | Carelizumab |
| 25 | Male | 60 | 4 | 23 | 85 | 2400 | 2 | Bevacizumab | Atezolizumab |
| 26 | Male | 59 | 4 | 46 | 135 | 2400 | 1 | Lenvatinib | Pembrolizumab |
| 27 | Male | 66 | 6 | 23 | 85 | 2400 | 2 | - | - |
| 28 | Male | 53 | 4 | 46 | 135 | 2400 | 1 | Lenvatinib | Pembrolizumab |
| 29 | Male | 52 | 1 | 23 | 135 | 2400 | 1 | Lenvatinib | Toripalimab |
| 30 | Male | 61 | 3 | 23 | 85 | 2400 | 3 | Lenvatinib | Sintilimab |
| 31 | Male | 41 | 6 | 23 | 85 | 2400 | 3 | Apatinib | Carelizumab |
| 32 | Male | 66 | 2 | 23 | 85 | 2400 | 1 | Apatinib | Carelizumab |
| 33 | Male | 52 | 1 | 23 | 85 | 2400 | 1 | Apatinib | Carelizumab |
| 34 | Male | 55 | 4 | 23 | 85 | 2400 | 1 | Bevacizumab | Atezolizumab |
| 35 | Male | 55 | 4 | 23 | 85 | 2400 | 2 | Bevacizumab | Atezolizumab |
| 36 | Male | 56 | 4 | 46 | 135 | 2400 | 2 | Bevacizumab | Atezolizumab |
| 37 | Male | 58 | 4 | 23 | 85 | 2400 | 1 | Lenvatinib | Toripalimab |
| 38 | Male | 58 | 4 | 23 | 85 | 2400 | 1 | Lenvatinib | Toripalimab |
| 39 | Male | 40 | 5 | 23 | 135 | 2400 | 1 | - | - |
| 40 | Male | 36 | 4 | 23 | 85 | 2400 | 4 | Apatinib | Toripalimab |
| 41 | Male | 68 | 2 | 23 | 85 | 2400 | 1 | - | - |
| 42 | Male | 46 | 4 | 23 | 85 | 2400 | 1 | Lenvatinib | Toripalimab |
| 43 | Male | 62 | 4 | 23 | 85 | 2400 | 1 | Bevacizumab | Sintilimab |
| 44 | Male | 61 | 4 | 46 | 135 | 2400 | 1 | - | - |
| 45 | Male | 72 | 4 | 46 | 135 | 2400 | 1 | Lenvatinib | Pembrolizumab |
| 46 | Male | 45 | 7 | 23 | 135 | 2400 | 1 | Lenvatinib | Carelizumab |
| 47 | Male | 60 | 4 | 23 | 135 | 2400 | 1 | Lenvatinib | Toripalimab |
| 48 | Male | 52 | 3 | 46 | 135 | 2400 | 1 | Lenvatinib | Tislelizumab |
| 49 | Male | 55 | 4 | 46 | 135 | 2400 | 1 | Lenvatinib | Durvalumab |
| 50 | Male | 41 | 4 | 46 | 135 | 2400 | 1 | Lenvatinib | Durvalumab |
| 51 | Male | 55 | 2 | 46 | 135 | 2400 | 1 | Lenvatinib | Durvalumab |
| 52 | Female | 50 | 4 | 23 | 135 | 2400 | 1 | Lenvatinib | - |
| 53 | Female | 81 | 1 | 23 | 85 | 1200 | 1 | Bevacizumab | Atezolizumab |
| 54 | Female | 45 | 3 | 23 | 135 | 2400 | 1 | Bevacizumab | Sintilimab |
| 55 | Male | 57 | 2 | 23 | 85 | 2400 | 1 | Bevacizumab | Sintilimab |
| 56 | Male | 71 | 4 | 46 | 135 | 2400 | 1 | Donafenib | Tislelizumab |
| 57 | Female | 39 | 5 | 23 | 85 | 2400 | 2 | Apatinib | Carelizumab |
| 58 | Male | 64 | 2 | 23 | 85 | 1800 | 1 | Donafenib | Tislelizumab |
| 59 | Male | 44 | 3 | 23 | 85 | 2400 | 1 | Apatinib | Carelizumab |
| 60 | Female | 29 | 5 | 46 | 135 | 2400 | 1 | Apatinib | Carelizumab |
| 61 | Male | 57 | 2 | 23 | 85 | 2400 | 2 | Lenvatinib | Sintilimab |
| 62 | Male | 51 | 2 | 23 | 85 | 1200 | 2 | Bevacizumab | Atezolizumab |
| 63 | Male | 69 | 4 | 23 | 85 | 2400 | 2 | Lenvatinib | Sintilimab |
| 64 | Male | 19 | 2 | 23 | 85 | 2400 | 1 | Apatinib | Carelizumab |
| 65 | Male | 68 | 4 | 23 | 85 | 1200 | 1 | Bevacizumab | Atezolizumab |
| 66 | Female | 70 | 2 | 23 | 135 | 2400 | 1 | Apatinib | - |
| 67 | Male | 60 | 8 | 23 | 85 | 2400 | 1 | Apatinib | - |
| 68 | Male | 60 | 3 | 23 | 85 | 1200 | 1 | Lenvatinib | Tislelizumab |
| 69 | Male | 61 | 2 | 23 | 85 | 1200 | 1 | Bevacizumab | Atezolizumab |
| 70 | Male | 58 | 5 | 46 | 135 | 2400 | 2 | - | Sintilimab |
| 71 | Male | 55 | 6 | 23 | 135 | 2400 | 1 | Lenvatinib | Toripalimab |
| 72 | Male | 59 | 4 | 23 | 135 | 1200 | 2 | - | Toripalimab |
| 73 | Male | 37 | 6 | 23 | 135 | 2400 | 1 | Lenvatinib | Sintilimab |
| 74 | Male | 39 | 6 | 23 | 85 | 2400 | 1 | Lenvatinib | Sintilimab |
| 75 | Male | 48 | 2 | 46 | 135 | 2400 | 3 | Lenvatinib | Tislelizumab |
| 76 | Male | 56 | 3 | 23 | 135 | 2400 | 1 | Lenvatinib | Toripalimab |
